# Supplementary material
Source: PubMed Central journal article supplement (PMC6028311)
Supplement: NIHMS973769-supplement-SI.pdf [file NIHMS973769-supplement-SI.pdf]

# <sup>86/90</sup>Y-based theranostics targeting angiogenesis in a murine breast cancer model

Emily B. Ehlerding<sup>1</sup>, Carolina A. Ferreira<sup>2</sup>, Eduardo Aluicio-Sarduy<sup>1</sup>, Dawei Jiang<sup>3</sup>, Hye Jin Lee<sup>4</sup>, Charles P. Theuer<sup>5</sup>, Jonathan W. Engle<sup>1</sup>, Weibo Cai<sup>1-4,6,\*</sup>

<sup>1</sup>Department of Medical Physics, University of Wisconsin – Madison

<sup>2</sup>Department of Biomedical Engineering, University of Wisconsin – Madison

<sup>3</sup>Department of Radiology, University of Wisconsin – Madison

<sup>4</sup>Pharmaceutical Sciences Department, University of Wisconsin – Madison

<sup>5</sup>TRACON Pharmaceuticals, Inc.

<sup>6</sup>Carbone Comprehensive Cancer Center, University of Wisconsin – Madison

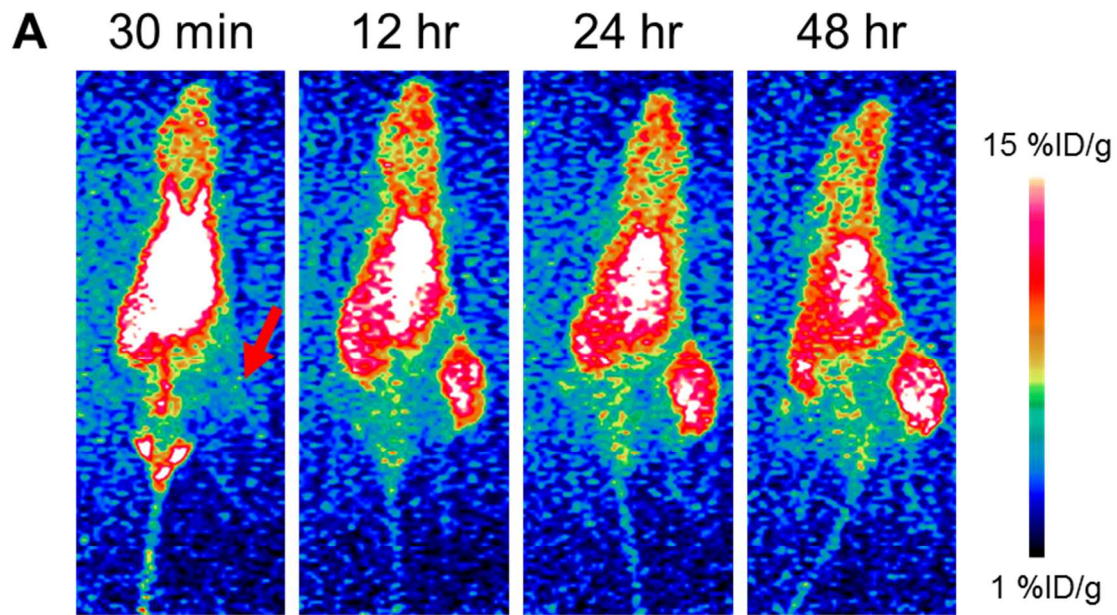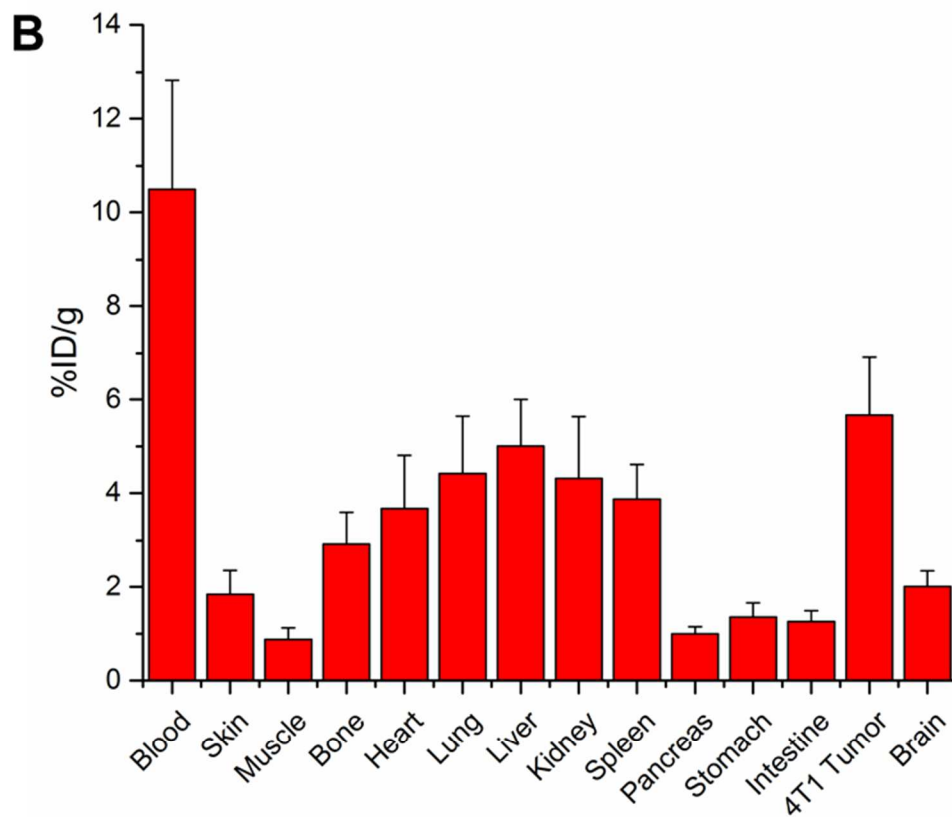

**Figure S1.** PET imaging of  $^{86}\text{Y}$ -DTPA-IgG. (A) Serial representative MIP images. (B) *Ex vivo* biodistribution results, n=4.

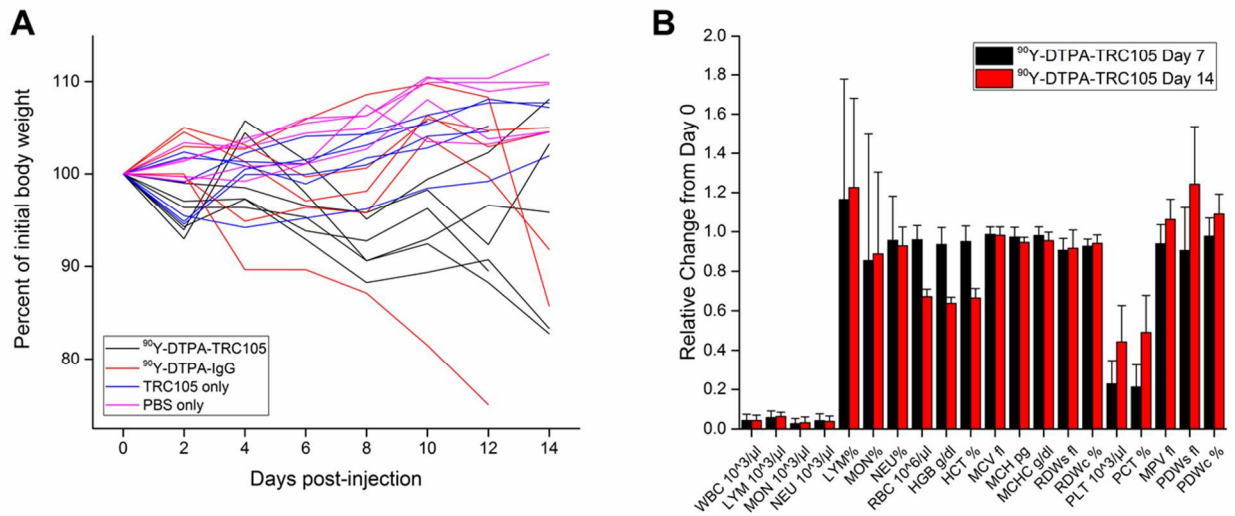

**Figure S2.** Results of toxicity monitoring. (A) Body weights of all mice were measured every other day. (B) Complete blood count analyses from mice injected with  $^{90}\text{Y}$ -DTPA-TRC105. N=5-6 per group.

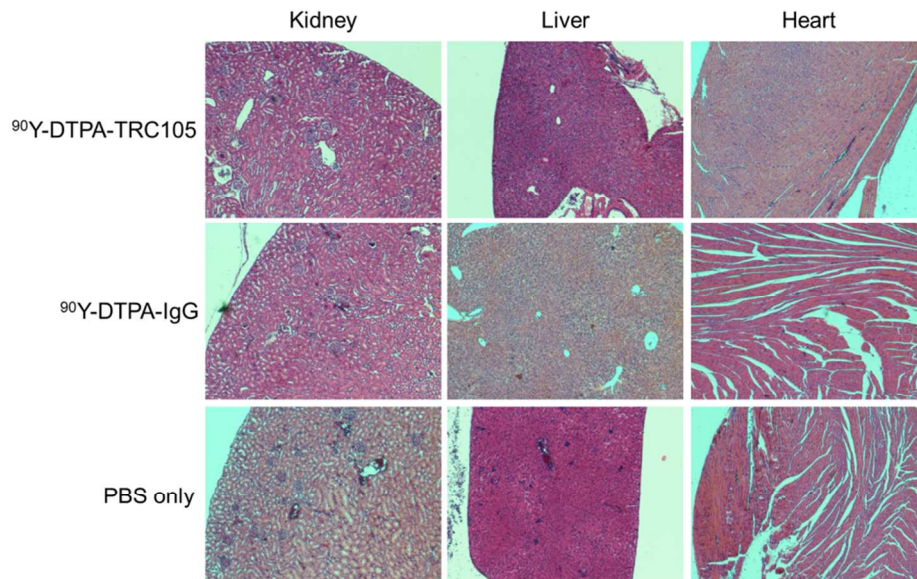

**Figure S3.** Histological evaluation of tissues from therapeutic groups at 14 days post-injection.

**Table S1.** PET ROI data following injection of  $^{86}\text{Y}$ -DTPA-TRC105, in %ID/g, n=4.

| <b>Organ</b>  | <b>30 min</b> | <b>12 h</b>  | <b>24 h</b>  | <b>48 h</b> |
|---------------|---------------|--------------|--------------|-------------|
| <b>Heart</b>  | 19.53 ± 4.10  | 12.10 ± 2.52 | 12.60 ± 0.10 | 9.13 ± 1.73 |
| <b>Liver</b>  | 14.25 ± 3.36  | 8.75 ± 1.19  | 9.80 ± 0.30  | 7.13 ± 0.93 |
| <b>Spleen</b> | 9.03 ± 2.01   | 6.90 ± 1.38  | 8.00 ± 1.40  | 6.43 ± 1.61 |
| <b>Tumor</b>  | 2.28 ± 0.55   | 8.10 ± 0.95  | 9.60 ± 0.30  | 9.13 ± 1.05 |
| <b>Muscle</b> | 1.53 ± 0.31   | 1.58 ± 0.18  | 1.95 ± 0.05  | 1.48 ± 0.19 |
| <b>Brain</b>  | 2.08 ± 0.41   | 1.65 ± 0.46  | 1.55 ± 0.05  | 1.35 ± 0.33 |

**Table S2.** PET ROI data following injection of  $^{86}\text{Y}$ -DTPA-IgG, in %ID/g, n=4.

| <b>Organ</b>  | <b>30 min</b> | <b>12 h</b>  | <b>24 h</b>  | <b>48 h</b>  |
|---------------|---------------|--------------|--------------|--------------|
| <b>Heart</b>  | 22.08 ± 3.51  | 14.58 ± 2.97 | 12.43 ± 2.43 | 10.90 ± 2.60 |
| <b>Liver</b>  | 15.43 ± 2.57  | 9.83 ± 1.66  | 9.20 ± 1.59  | 8.10 ± 1.43  |
| <b>Spleen</b> | 7.98 ± 2.06   | 7.60 ± 1.63  | 7.20 ± 1.69  | 6.70 ± 1.74  |
| <b>Tumor</b>  | 2.55 ± 0.81   | 7.98 ± 1.14  | 8.58 ± 1.31  | 8.63 ± 1.59  |
| <b>Muscle</b> | 1.65 ± 0.35   | 1.78 ± 0.57  | 1.75 ± 0.63  | 1.65 ± 0.48  |
| <b>Brain</b>  | 2.80 ± 0.29   | 2.05 ± 0.54  | 2.15 ± 0.30  | 1.80 ± 0.32  |
